# Supplementary material
Source: PubMed Central journal article supplement (PMC8408915)
Supplement: NIHMS1735001-supplement-supporting_information.pdf [file NIHMS1735001-supplement-supporting_information.pdf]

## **Supporting information**

### **Lysine deacetylase substrate selectivity: a dynamic ionic interaction specific to KDAC8**

Tasha B. Toro\*, Jordan S. Swanier, Jada A. Bezue, Christian G. Broussard, Terry J. Watt\*

Department of Chemistry, Xavier University of Louisiana, 1 Drexel Dr., New Orleans, LA 70125-1098

email: [tjwatt@xula.edu](mailto:tjwatt@xula.edu) (TJW), [ttoro@xula.edu](mailto:ttoro@xula.edu) (TBT)

**Table S1. Specific activity values of peptides in low ionic strength buffer plotted as normalized values**

| Enzyme      | Peptide              | Specific activity (s <sup>-1</sup> ) | Activity (pmol s <sup>-1</sup> ) <sup>†</sup> |
|-------------|----------------------|--------------------------------------|-----------------------------------------------|
| KDAC8       | FRK <sup>ac</sup> RW | 0.035 ± 0.007                        |                                               |
| KDAC8       | FRK <sup>ac</sup> RW | 0.025 ± 0.002*                       |                                               |
| KDAC8       | ISK <sup>ac</sup> FD | 0.0040 ± 0.0009                      |                                               |
| KDAC8       | SLK <sup>ac</sup> FG | 0.0084 ± 0.0016                      |                                               |
| KDAC8       | FRK <sup>ac</sup> AW | 0.034 ± 0.004                        |                                               |
| KDAC8       | FAK <sup>ac</sup> RW | 0.0039 ± 0.0007                      |                                               |
| KDAC8       | ARK <sup>ac</sup> AA | 0.0028 ± 0.0009                      |                                               |
| KDAC8       | AAK <sup>ac</sup> RA | 0.0000 ± 0.0002                      |                                               |
| KDAC8       | FKK <sup>ac</sup> RW | 0.016 ± 0.003*                       |                                               |
| KDAC8       | FQK <sup>ac</sup> RW | 0.009 ± 0.003                        |                                               |
| KDAC8       | FEK <sup>ac</sup> RW | 0.0008 ± 0.0005                      |                                               |
| KDAC8 D101E | FRK <sup>ac</sup> RW | 0.029 ± 0.004                        |                                               |
| KDAC8 D101N | FRK <sup>ac</sup> RW | 0.0000 ± 0.0004                      |                                               |
| KDAC8 D101A | FRK <sup>ac</sup> RW | 0.0000 ± 0.0005                      |                                               |
| KDAC8 D101R | FRK <sup>ac</sup> RW | 0.0001 ± 0.0007                      |                                               |
| KDAC8 D101E | FKK <sup>ac</sup> RW | 0.017 ± 0.007*                       |                                               |
| KDAC8 D101E | FQK <sup>ac</sup> RW | 0.0057 ± 0.0011                      |                                               |
| KDAC8 D101E | FAK <sup>ac</sup> RW | 0.0052 ± 0.0007                      |                                               |
| KDAC8 D101E | FEK <sup>ac</sup> RW | 0.0009 ± 0.0003                      |                                               |
| KDAC1       | FRK <sup>ac</sup> RW |                                      | 0.32 ± 0.03                                   |
| KDAC1       | FRK <sup>ac</sup> RW |                                      | 0.030 ± 0.015*                                |
| KDAC1       | FKK <sup>ac</sup> RW |                                      | 0.036 ± 0.018*                                |
| KDAC1       | FQK <sup>ac</sup> RW |                                      | 0.30 ± 0.03                                   |
| KDAC1       | FAK <sup>ac</sup> RW |                                      | 0.16 ± 0.02                                   |
| KDAC1       | FEK <sup>ac</sup> RW |                                      | 0.033 ± 0.005                                 |
| KDAC1       | FRK <sup>ac</sup> AW |                                      | 0.22 ± 0.05                                   |
| KDAC6       | FRK <sup>ac</sup> RW | 0.024 ± 0.009                        |                                               |
| KDAC6       | FRK <sup>ac</sup> RW | 0.029 ± 0.004*                       |                                               |
| KDAC6       | FKK <sup>ac</sup> RW | 0.027 ± 0.004*                       |                                               |
| KDAC6       | FQK <sup>ac</sup> RW | 0.015 ± 0.009                        |                                               |
| KDAC6       | FAK <sup>ac</sup> RW | 0.0179 ± 0.0019                      |                                               |
| KDAC6       | FEK <sup>ac</sup> RW | 0.031 ± 0.008                        |                                               |
| KDAC6       | FRK <sup>ac</sup> AW | 0.0241 ± 0.0015                      |                                               |

\* indicates measured using mass spectrometry assay.

† KDAC1 is reported as raw activity because the commercial sample was of low purity.

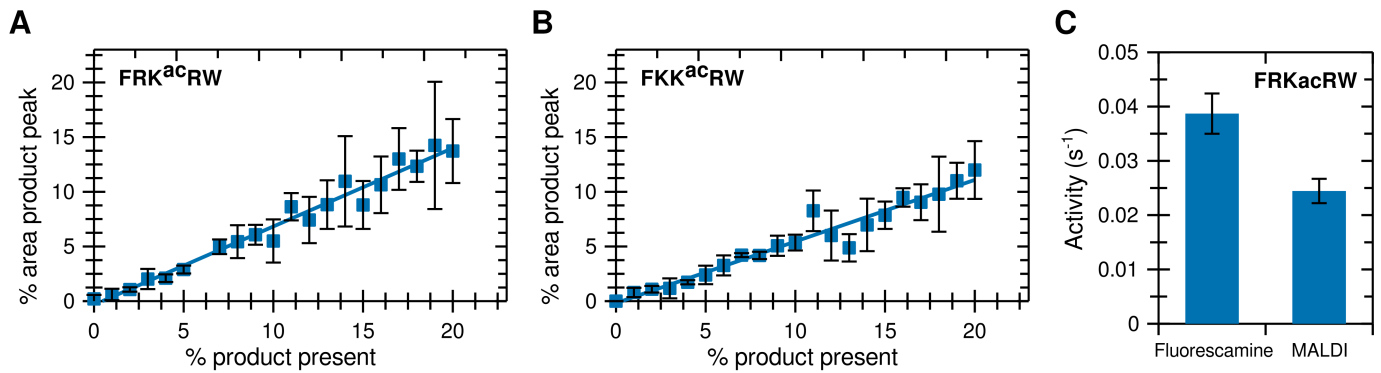

**Figure S1. MALDI-TOF assay to measure specific activity of lysine deacetylases with peptide substrates.**

(A) Standard curve of peak area ratios from mass spectrometry of defined ratios of product peptide (FRKRW) and substrate peptide (FRK<sup>ac</sup>RW). Error bars represent standard deviations ( $n \geq 3$ ). The line represents the linear fit. (B) Standard curve of peak area ratios from mass spectrometry of defined ratios of product peptide (FKKRW) and substrate peptide (FKK<sup>ac</sup>RW). Data is represented as in panel A. (C) KDAC8 was reacted with FRK<sup>ac</sup>RW. Each reaction replicate was assayed by both the fluorescamine assay as previously reported and the MALDI-TOF assay described here.<sup>22</sup> Error bars represent standard deviations ( $n=4$ ). The difference in activity was not statistically significant using a paired t-test ( $p > 0.05$ ).

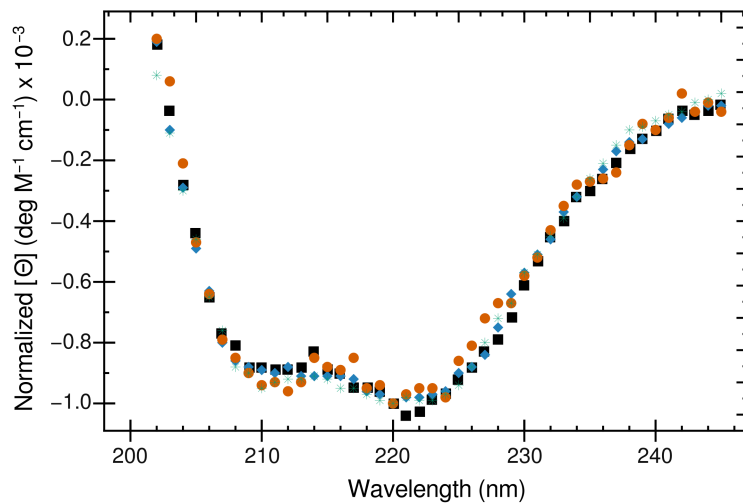

**Figure S2. Circular dichroism spectra of KDAC8 variants do not indicate significant structural differences.** Circular dichroism was performed with wild-type KDAC8 (black squares), KDAC8 D101N (blue diamonds), KDAC8 D101A (red circles) and KDAC8 D101R (green stars).
